# Supplementary material for: Modeling Tumor-Host Interactions of Chronic Lymphocytic Leukemia in Xenografted Mice to Study Tumor Biology and Evaluate Targeted Therapy
Source: PubMed Central journal article supplement (PMC4126654; doi:10.1038/leu.2013.131), 2013-04-26

# Supplementary Figure S1

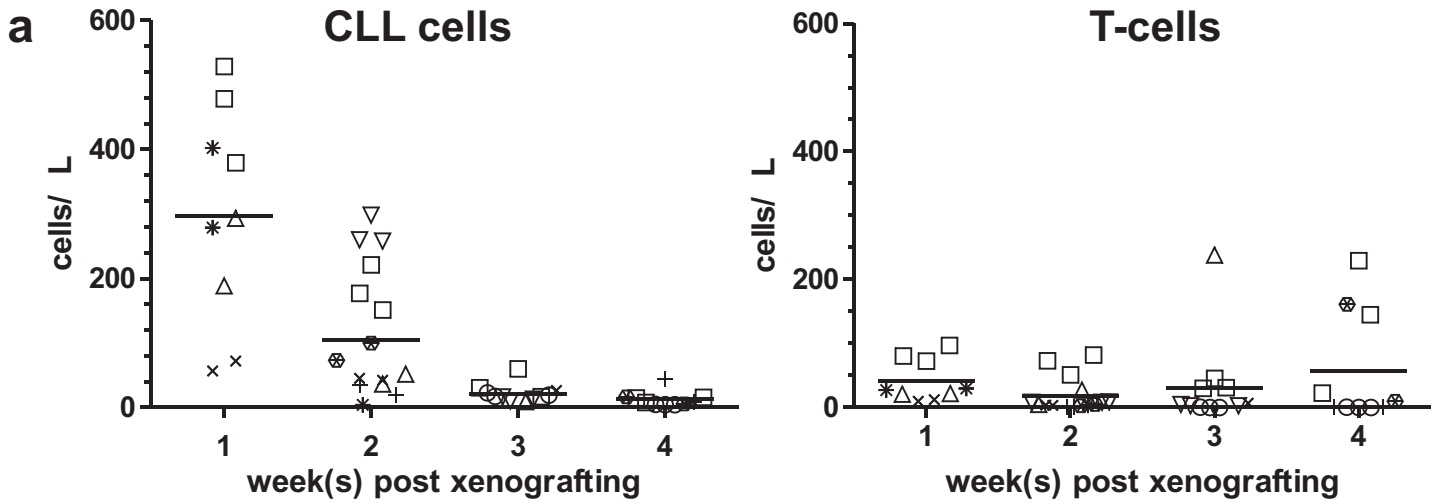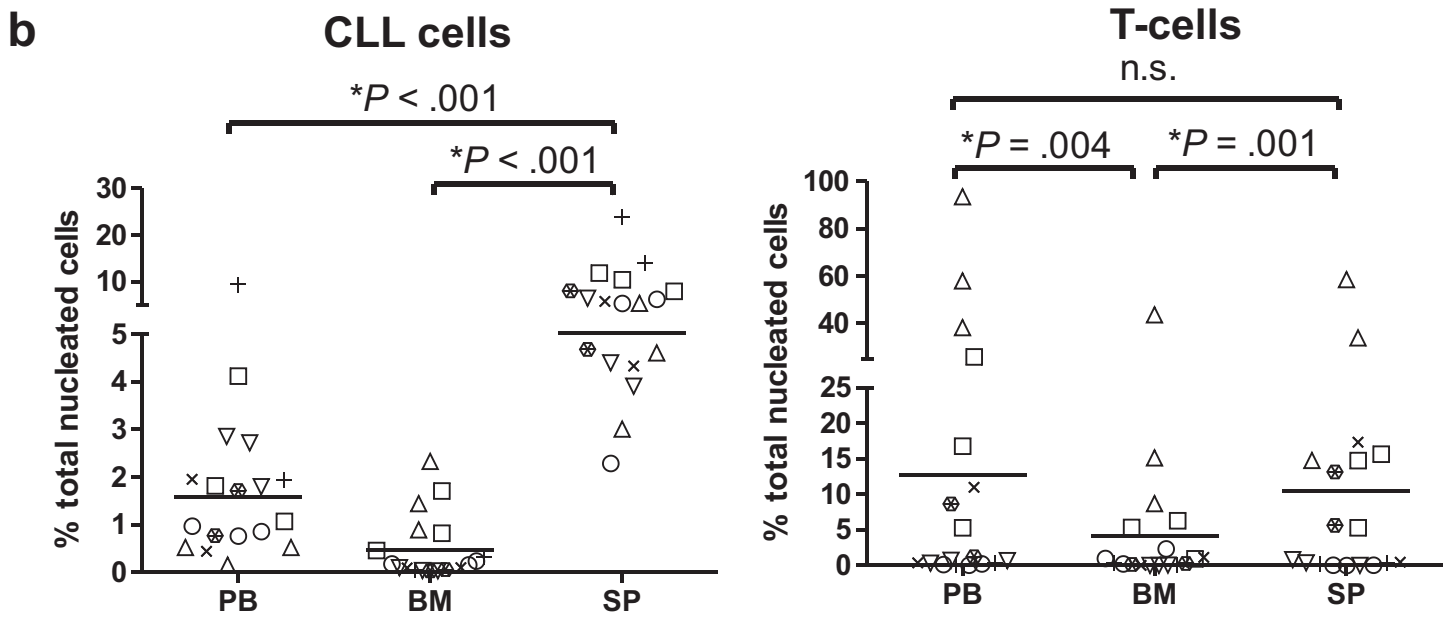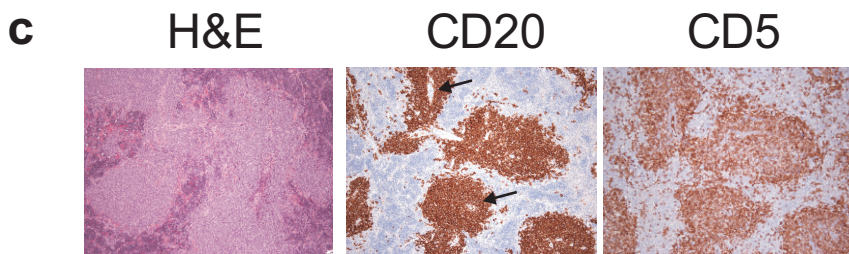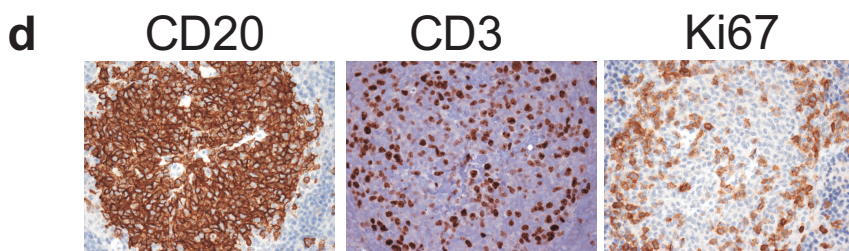

# Supplementary Figure S2

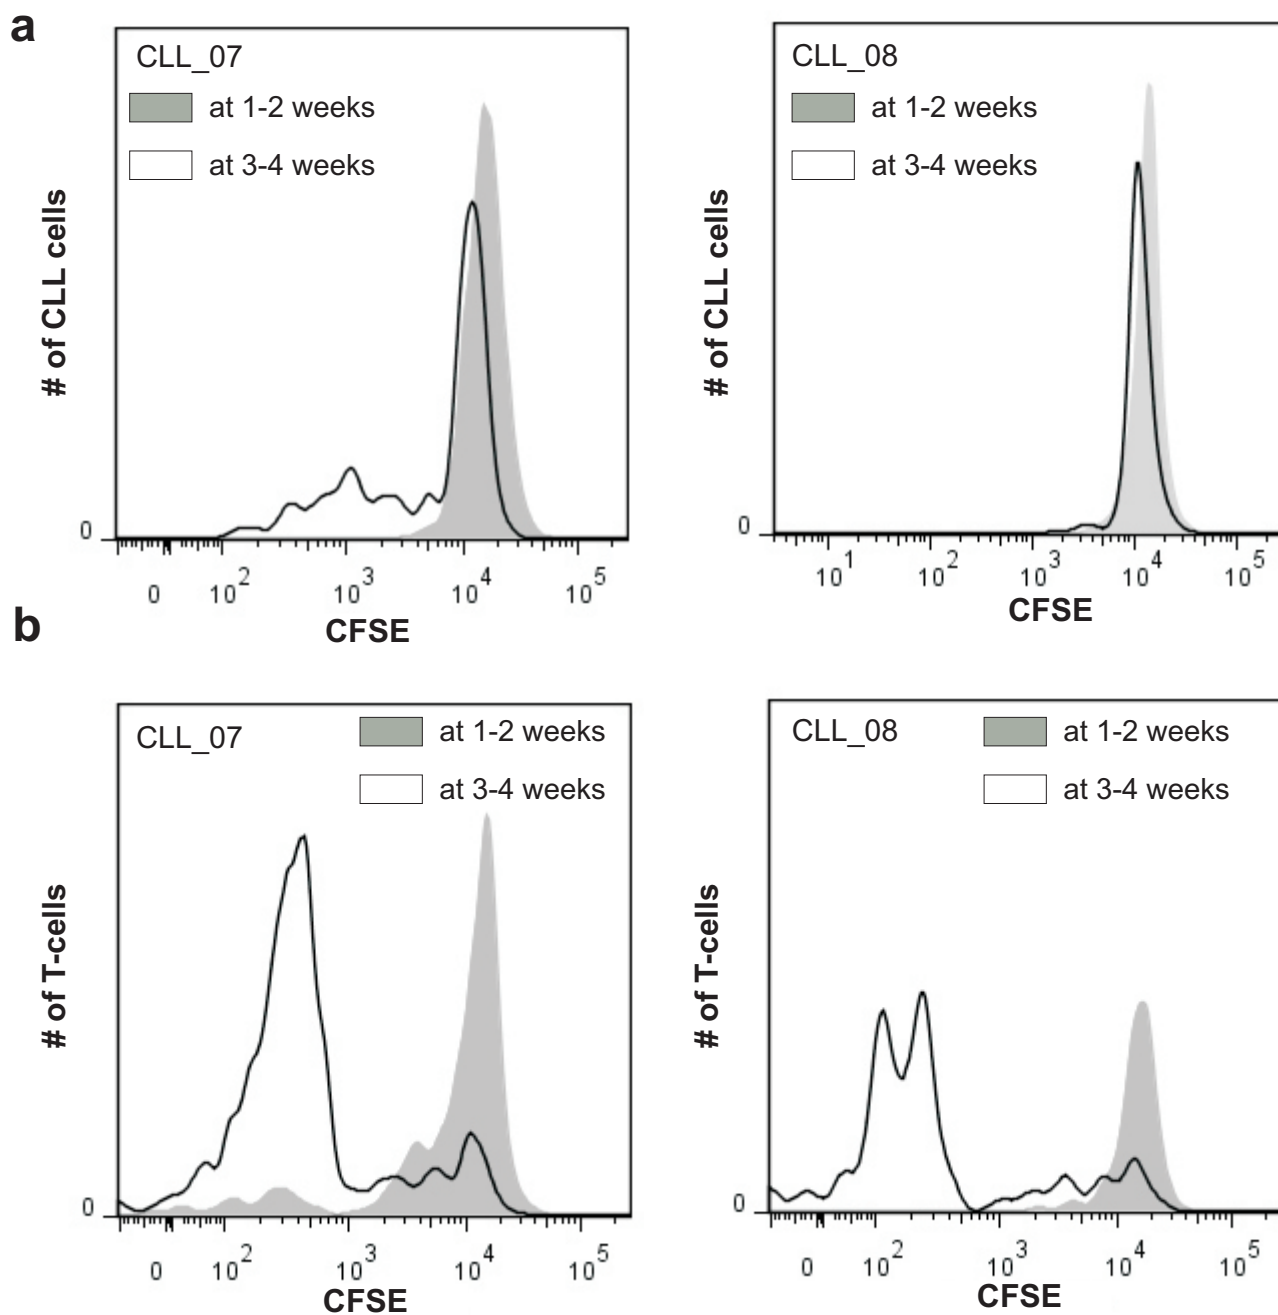

# Supplementary Figure S3

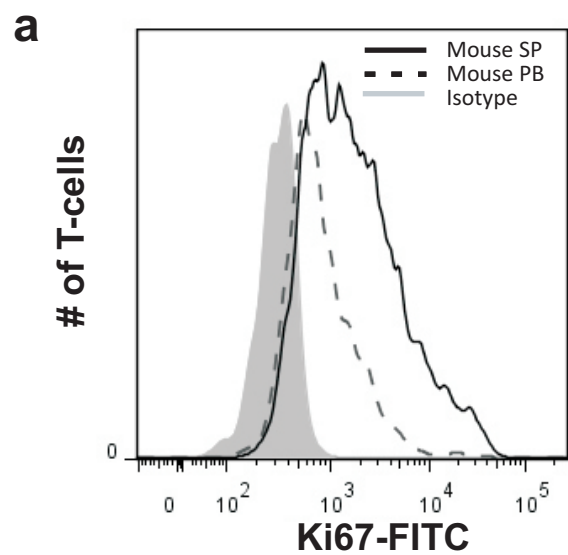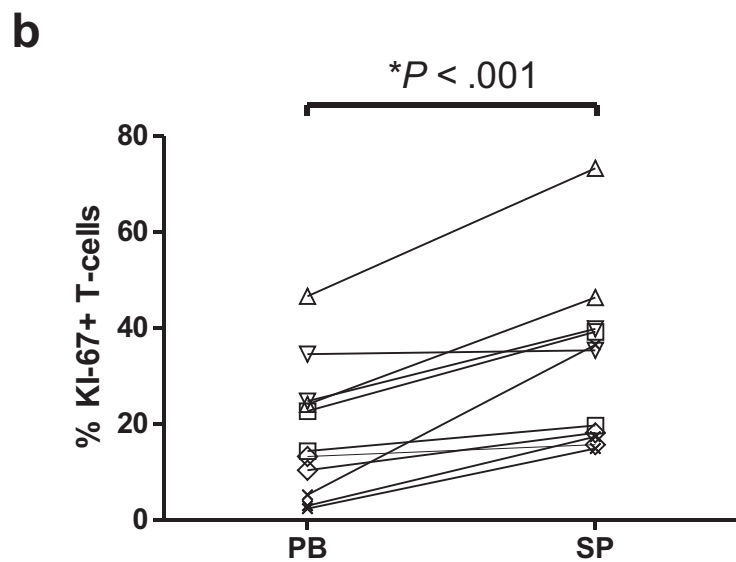

# Supplementary Figure S4

a

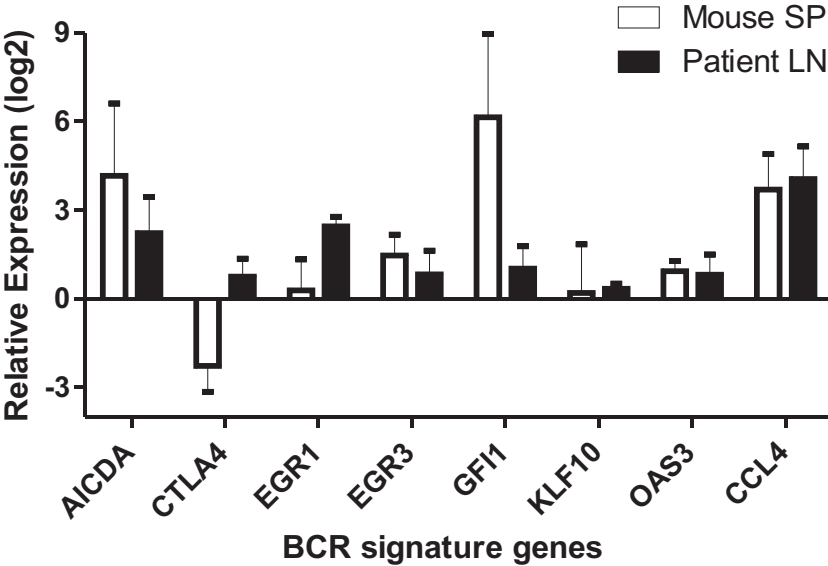

b

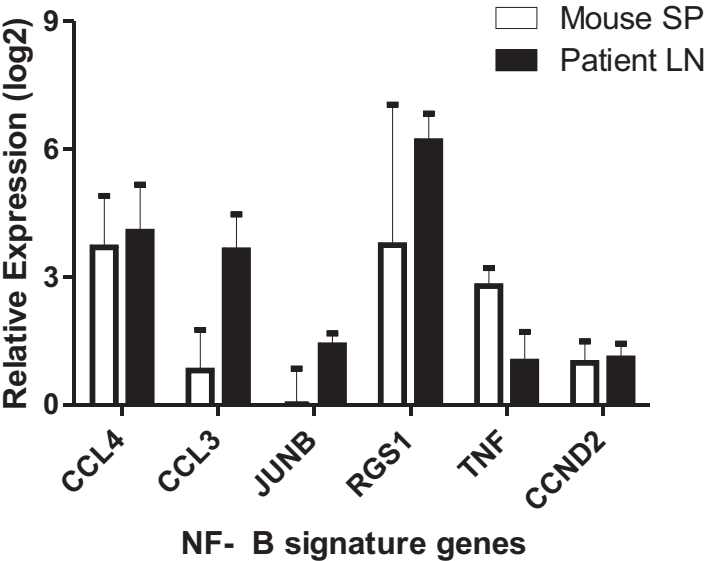

# Supplementary Figure S5

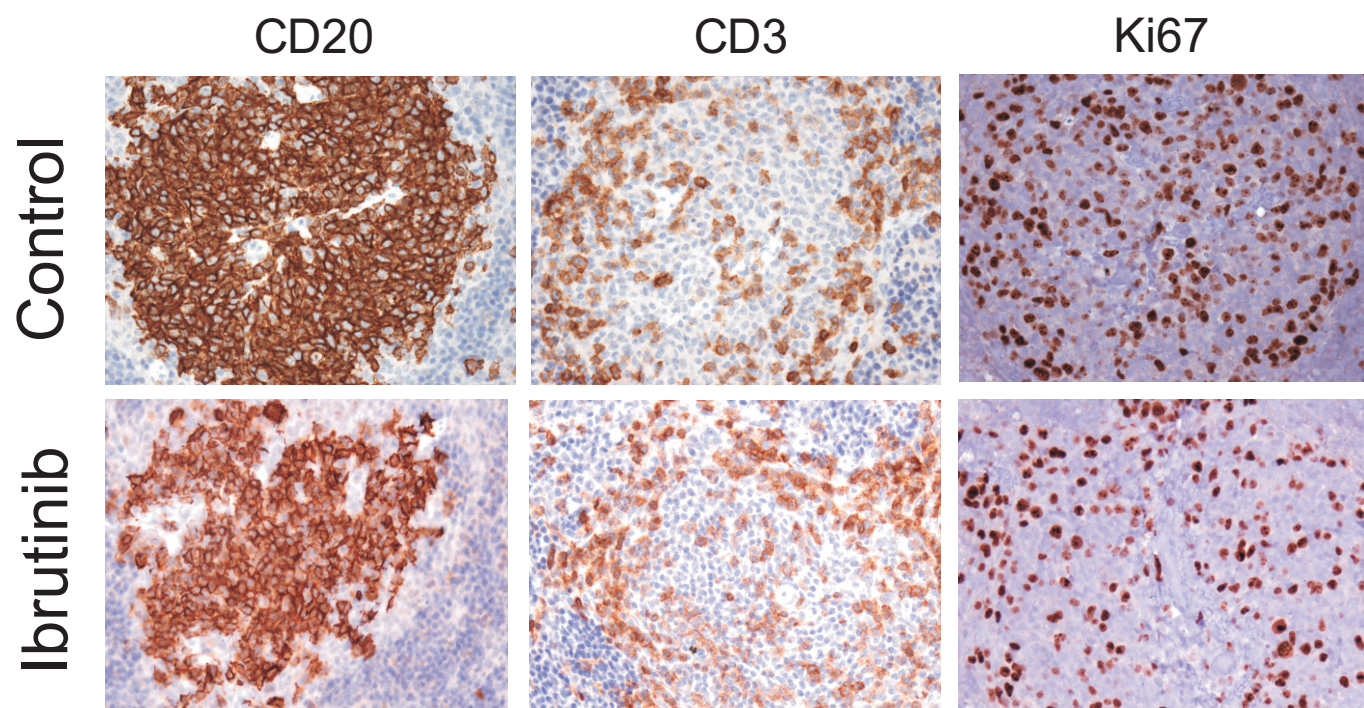

# Supplementary Figure S6

**a** PB (CLL\_01)

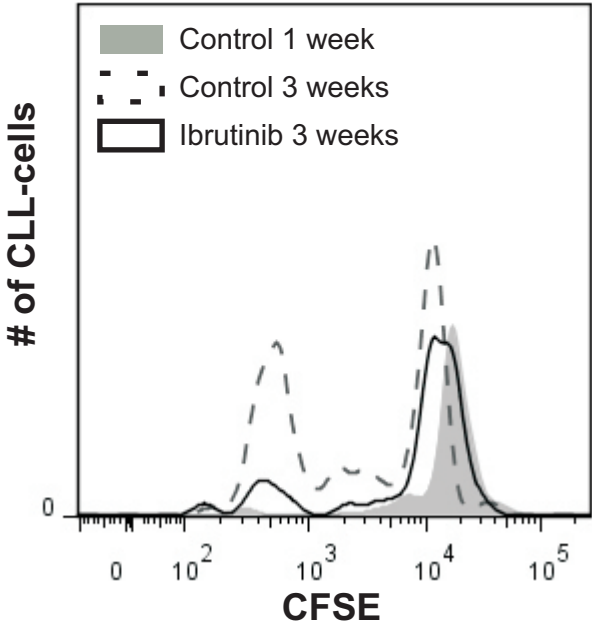

SP (CLL\_01)

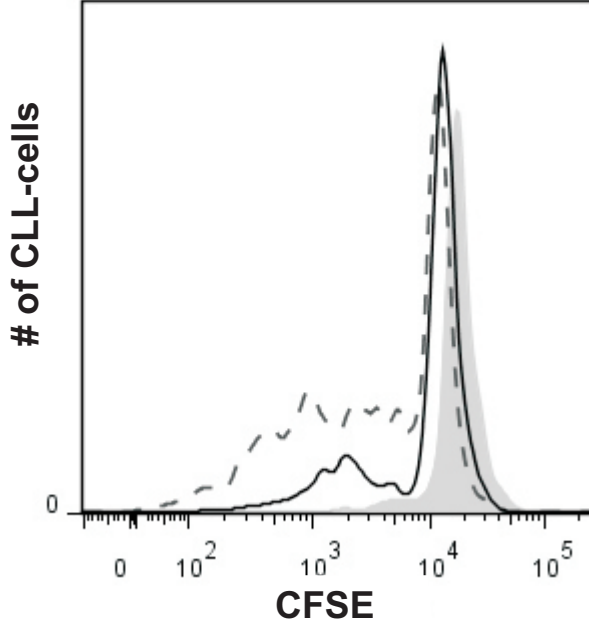

**b** PB (CLL\_01)

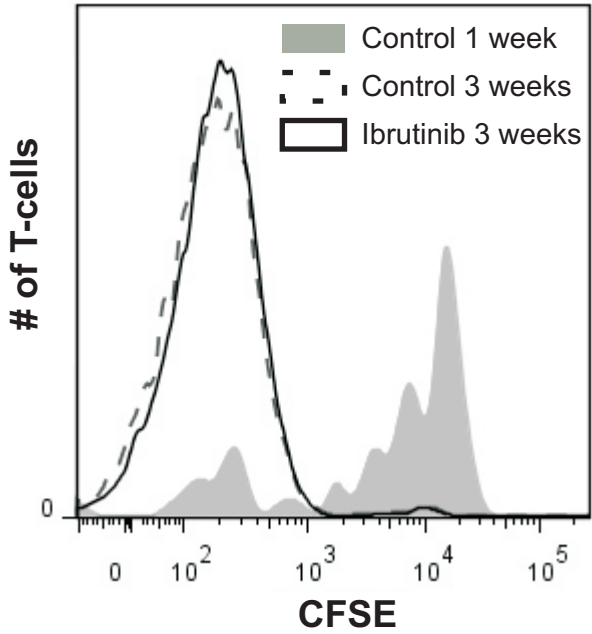

SP (CLL\_01)

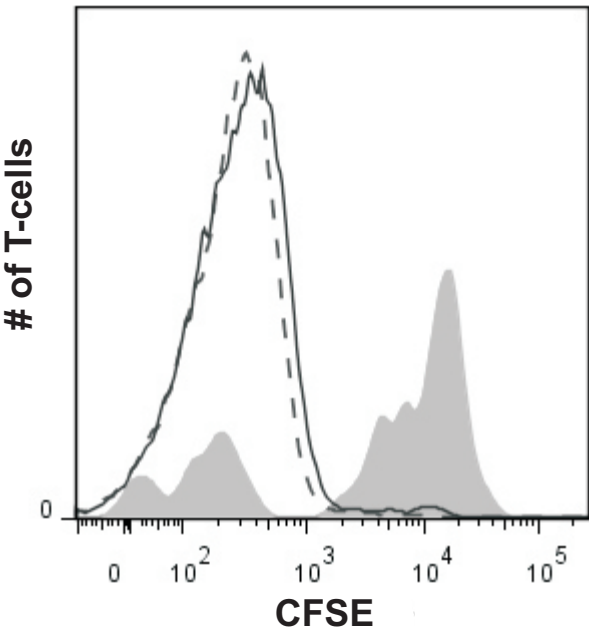

# Supplementary Figure S7

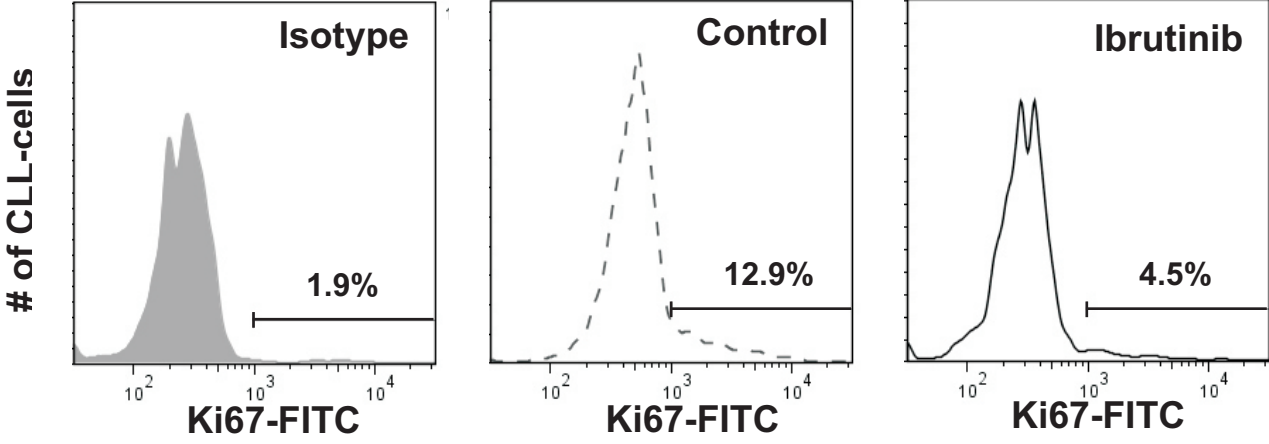

Supplement: NIHMS549954-supplement-1.pdf [file NIHMS549954-supplement-1.pdf]
